# Supplementary material for: Transcriptional Profiling of Cardiac Cells Links Age-Dependent Changes in Acetyl-CoA Signaling to Chromatin Modifications
Source: MDPI journal article supplement (doi:10.3390/ijms22136987), 2021-06-29
Supplement: s1 [file s1]

## **Supplemental Materials and Methods**

### **Cell Isolation and Culture**

All cardiac tissue-derived stem like cells (CTSCs) were isolated from the heart tissue of C57BL/6 Mice (Jackson). The heart was digested, centrifuged and pellet was formed followed by plating in growth media growth media that includes DMEM-F12 (Gibco), 10% Embryonic Stem Cell Fetal Bovine Serum (Gibco), 1% Penicillin-Streptomycin-Glutamine (PSG) (Gibco), 1x Insulin-Transferrin-Selenium (Gibco), Recombinant Human-EGF 10ng/mL (Peprotech), Recombinant Human-FGF 10ng/mL (Peprotech), and Leukemia Inhibitory Factor 50,000 units (Millipore Sigma), and incubated in a 37°C 5% CO<sub>2</sub> incubator. Routine cell culturing passaging include 1x PBS wash (Gibco), dissociation of cells using 0.25% Trypsin EDTA (Gibco), centrifugation for 5 minutes at 1500RPM was carried out for the next 14 days that led to the emergence of CTSCs. Pelleted cells were resuspended in CTSCs Growth media and counted using a hemocytometer. Afterwards, cells were plated onto polystyrene tissue culture plates (Falcon Corning).

### **Immunoblot**

Immunoblot analysis was done for CTSCs as described previously [1-3,6]. Briefly, 100uL of Protein Lysis buffer that consists of Na<sub>3</sub>VO<sub>4</sub>, NaF, 4% SDS/PBS, and Protease Inhibitor was added to the cells. Samples were then added to QIASHredder (Qiagen) and spun at max rpm for 10min. Flow-through sample was collected and protein quantification was performed using Pierce BCA Protein Assay Kit (Invitrogen). Samples were normalized to 20ug/well and western blot assay was performed. Protein samples were loaded onto 4-20% Mini-PROTEAN TGX Precast Protein Gels (Bio-Rad) for electrophoresis. After transfer, blot was washed in 1x TBS and blocked with Odyssey PBS Blocking Buffer (LI-COR) for 1 hour. Primary antibody incubation was performed overnight and washed in 1x TBS. Secondary antibody incubation was done for 90 minutes and washed with 0.1% TBST two times followed by 0.4% TBST. Antibody scanning was conducted using Odyssey CLx Western Blot Detection System (LI-COR). Antibody and dilutions are listed on Supplemental Table I.

**Table S1 – List of primers**

| <b>Primer Name</b> | <b>Forward/Reverse</b> | <b>Product size</b> | <b>Sequence</b>             |
|--------------------|------------------------|---------------------|-----------------------------|
| ACSS2              | Forward                | 102                 | GCC ATA TGC TGA CCC CTC TC  |
| ACSS2              | Reverse                |                     | TCC CCG GAC TCA TTC AGG AT  |
| ACLY               | Forward                | 118                 | CTA TGC CCC AAG GAA AGA GTG |
| ACLY               | Reverse                |                     | TCT CGG GAA CAC ACG TAG TC  |
| CTP1a              | Forward                | 118                 | GGACTCCGCTCGCTCATT          |
| CTP1a              | Reverse                |                     | GAGATCGATGCCATCAGGGG        |
| PDHB               | Forward                | 90                  | AGT TGC CCA GTA TGA CGG TG  |
| PDHB               | Reverse                |                     | TCT GAG ATG GGG GTG TCG AT  |
| SLC25a1            | Forward                | 76                  | GGAGGCACACAAATACCGGA        |
| SLC25a1            | Reverse                |                     | GTAGAATGCCTTTGGCCCT         |

**Table S2 – List of antibodies**

| <b>Application</b> | <b>Antibody</b>   | <b>Dilution</b> | <b>Cat No.</b> | <b>Company</b> |
|--------------------|-------------------|-----------------|----------------|----------------|
| Western Blot       | Histone H3        | 1:100           | 9715           | Cell Signaling |
| Western Blot       | Acetyl Histone H3 | 1:100           | 06-599         | Millipore      |
| Western Blot       | AceCS1            | 1:100           | 3658S          | Cell Signaling |
| Western Blot       | ATP Citrate Lyase | 1:100           | 4332S          | Cell Signaling |
| Western Blot       | $\beta$ actin     | 1:500           | 9664S          | Cell Signaling |

# Supplementary Figure 1

## A Cluster 2

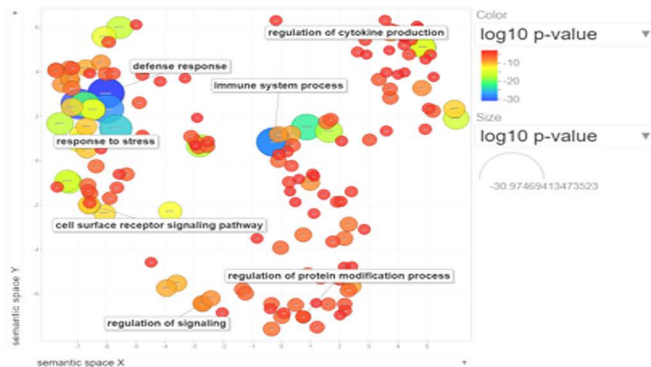

## B

## Cluster 3

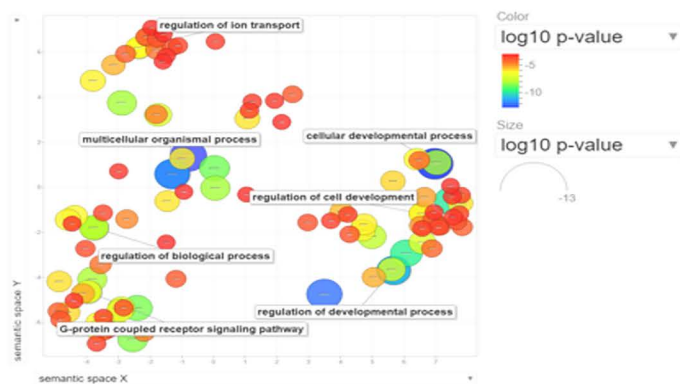

## C

## Cluster 4

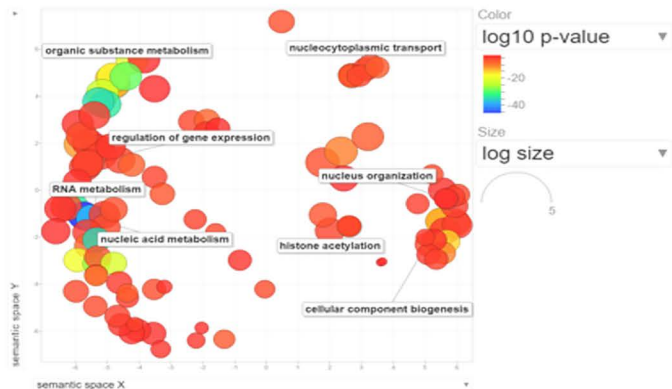

## D

## Cluster 5

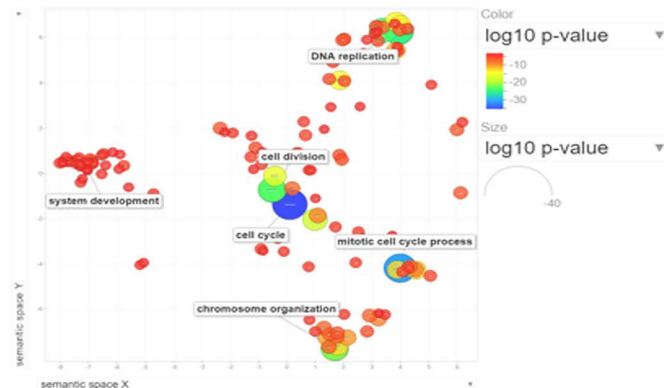





Supplementary Figure 3

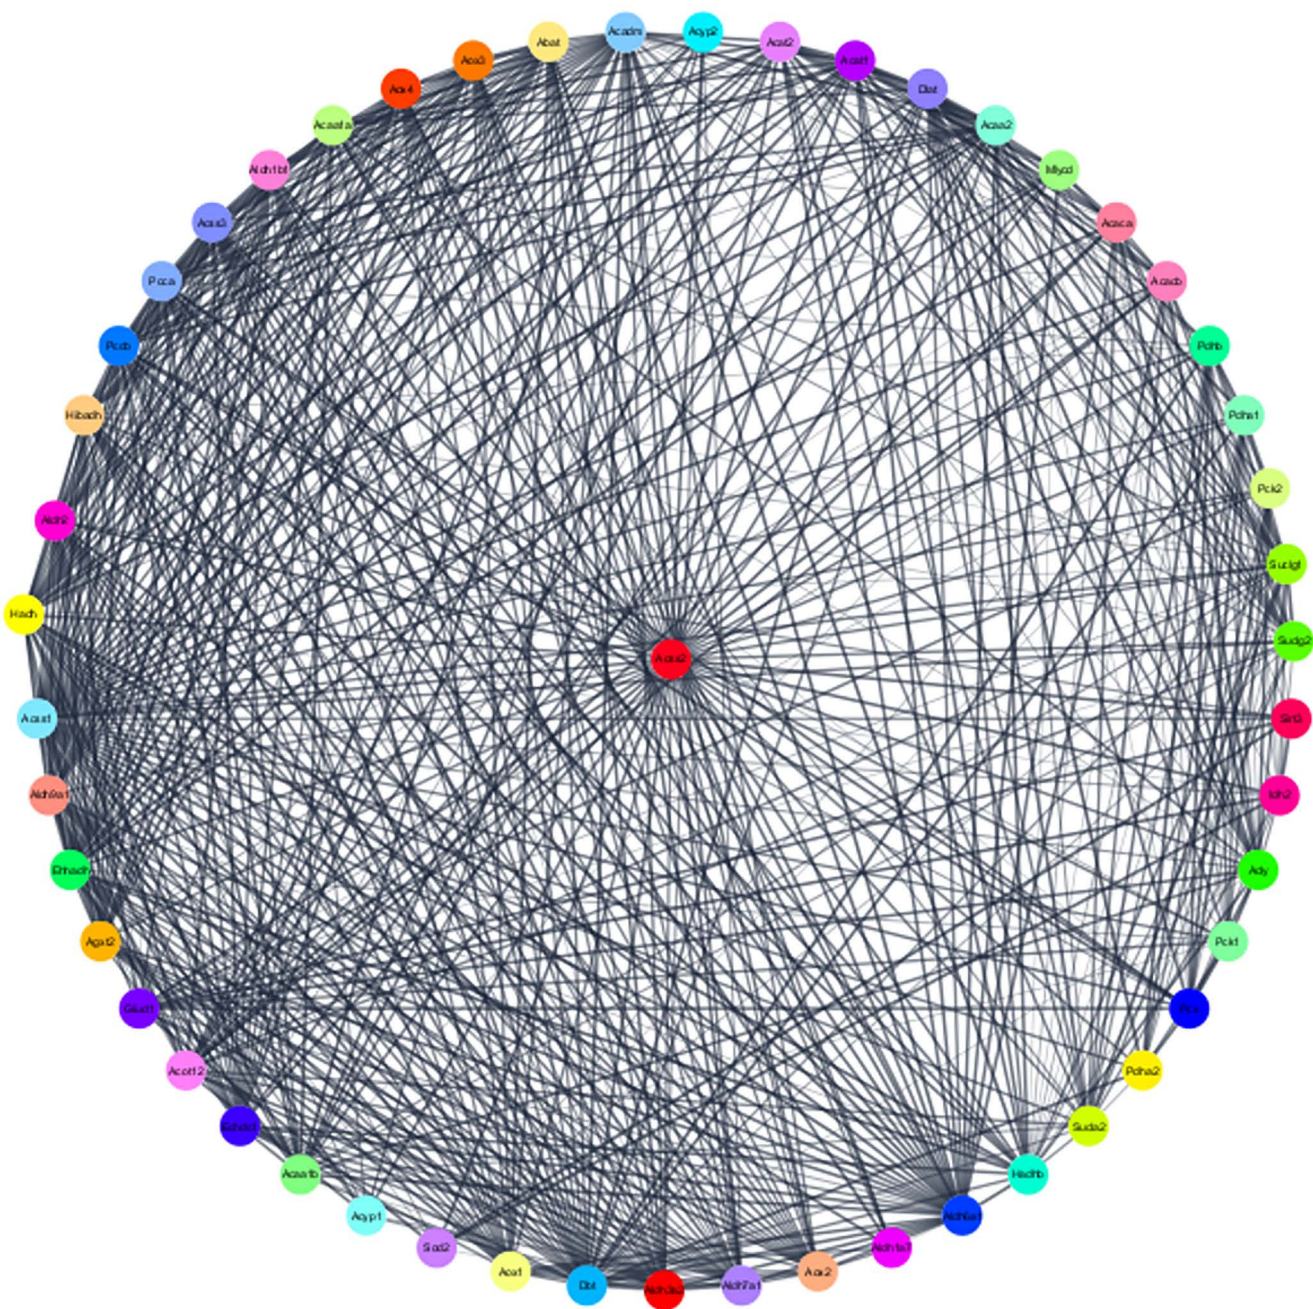

| Top Gene       | logFC       | adj.p-value |
|----------------|-------------|-------------|
| <b>Lipa</b>    | 1.880428797 | 8.3778E-265 |
| <b>Lima1</b>   | 1.386559217 | 4.9641E-287 |
| <b>P4ha1</b>   | 1.216435527 | 4.0584E-292 |
| <b>Idh1</b>    | 1.584898068 | 1.4915E-241 |
| <b>Asah1</b>   | 0.963340936 | 1.8342E-167 |
| <b>Il1rap</b>  | 2.253245162 | 4.1379E-303 |
| <b>Serinc1</b> | 0.986106666 | 7.161E-242  |
| <b>Ilvbl</b>   | 2.185676922 | 1.048E-151  |
| <b>Sqle</b>    | 0.920963676 | 4.2693E-134 |
| <b>Cd44</b>    | 0.996198493 | 5.32E-285   |

|               |                       |              |  |                |
|---------------|-----------------------|--------------|--|----------------|
| <b>Lipa</b>   | <b>Predicted Gene</b> | <b>Score</b> |  | <b>Lima1</b>   |
|               | Apob                  | 0.926        |  |                |
|               | Dhcr7                 | 0.924        |  |                |
|               | Dhcr24                | 0.905        |  |                |
|               | Cel                   | 0.889        |  |                |
|               | Ch25h                 | 0.869        |  |                |
|               | Cyp27a1               | 0.861        |  |                |
|               | Cyp7a1                | 0.853        |  |                |
|               | Cyp11a1               | 0.814        |  |                |
|               | Cyp46a1               | 0.813        |  |                |
|               | Sult2b1               | 0.804        |  |                |
|               |                       |              |  |                |
| <b>Il1rap</b> | <b>Predicted Gene</b> | <b>Score</b> |  | <b>Serinc1</b> |
|               | Il33                  | 0.994        |  |                |
|               | Il1b                  | 0.992        |  |                |
|               | Il1rl1                | 0.992        |  |                |
|               | Il1r1                 | 0.986        |  |                |
|               | Il1f5                 | 0.979        |  |                |
|               | Irak1                 | 0.979        |  |                |
|               | Il1f8                 | 0.978        |  |                |
|               | Il1f6                 | 0.975        |  |                |
|               | Tollip                | 0.97         |  |                |
|               | Il1f10                | 0.968        |  |                |

| Predicted Gene     | Score |  | P4ha1 | Predicted Gene | Score |  |
|--------------------|-------|--|-------|----------------|-------|--|
| Cdh1               | 0.727 |  |       | P4hb           | 0.966 |  |
| Vcl                | 0.721 |  |       | Col1a1         | 0.947 |  |
| Pxn                | 0.648 |  |       | Col3a1         | 0.939 |  |
| Ctnnd1             | 0.6   |  |       | Col13a1        | 0.938 |  |
| ENSMUSG00000101645 | 0.593 |  |       | Col5a1         | 0.936 |  |
| Lmo7               | 0.58  |  |       | Col1a2         | 0.932 |  |
| Fmn1               | 0.543 |  |       | Col4a1         | 0.929 |  |
| Milt4              | 0.54  |  |       | Col4a2         | 0.928 |  |
| Lims1              | 0.514 |  |       | Col9a1         | 0.924 |  |
| Plec               | 0.508 |  |       | Col5a2         | 0.924 |  |
|                    |       |  |       |                |       |  |
| Predicted Gene     | Score |  | Ilvbl | Predicted Gene | Score |  |
| Vapa               | 0.745 |  |       | Syde1          | 0.705 |  |
| Dtwd2              | 0.674 |  |       | Cyc1           | 0.7   |  |
| Sptssa             | 0.613 |  |       | Ndufs3         | 0.695 |  |
| Cnot6l             | 0.612 |  |       | Atp1b1         | 0.691 |  |
| Tvp23b             | 0.591 |  |       | Uqcrcq         | 0.668 |  |
| Sptssb             | 0.589 |  |       | Ephx3          | 0.62  |  |
| Tmem30a            | 0.566 |  |       | Gm364          | 0.573 |  |
| Tlhc1              | 0.524 |  |       | Ccdc105        | 0.536 |  |
| Ttk                | 0.523 |  |       | Slc5a2         | 0.532 |  |
| Unc5cl             | 0.514 |  |       | Mtch1          | 0.531 |  |



|             |                       |              |  |              |                       |              |
|-------------|-----------------------|--------------|--|--------------|-----------------------|--------------|
| <b>Idh1</b> | <b>Predicted Gene</b> | <b>Score</b> |  | <b>Asah1</b> | <b>Predicted Gene</b> | <b>Score</b> |
|             | Idh3g                 | 0.987        |  |              | Cerk                  | 0.969        |
|             | Idh3a                 | 0.987        |  |              | Ugcg                  | 0.968        |
|             | Idh3b                 | 0.985        |  |              | Sphk2                 | 0.964        |
|             | Ogdh                  | 0.972        |  |              | Sphk1                 | 0.964        |
|             | Aco2                  | 0.972        |  |              | Asah2                 | 0.962        |
|             | ENSMUSG0000008423     | 0.965        |  |              | Kdsr                  | 0.959        |
|             | Aco1                  | 0.964        |  |              | Gba                   | 0.958        |
|             | Pgm2                  | 0.953        |  |              | Sgms2                 | 0.955        |
|             | Idh2                  | 0.951        |  |              | Sgms1                 | 0.953        |
|             | Ogdhl                 | 0.946        |  |              | Sgpp1                 | 0.951        |
|             |                       |              |  |              |                       |              |
| <b>Sqle</b> | <b>Predicted Gene</b> | <b>Score</b> |  | <b>Cd44</b>  | <b>Predicted Gene</b> | <b>Score</b> |
|             | Lss                   | 0.998        |  |              | Sell                  | 0.991        |
|             | Cyp51                 | 0.996        |  |              | Spp1                  | 0.99         |
|             | Msmo1                 | 0.996        |  |              | Sele                  | 0.987        |
|             | Fdft1                 | 0.996        |  |              | Hmmr                  | 0.985        |
|             | Idi1                  | 0.992        |  |              | Mmp9                  | 0.982        |
|             | Hmgcs1                | 0.991        |  |              | Itgax                 | 0.981        |
|             | Hmgcr                 | 0.985        |  |              | Hyal2                 | 0.979        |
|             | Nsdhl                 | 0.983        |  |              | Anpep                 | 0.976        |
|             | Hsd17b7               | 0.958        |  |              | Nanog                 | 0.97         |
|             | Sc5d                  | 0.958        |  |              | ErbB2                 | 0.969        |
